# Supplementary material for: Serial platelet level index improves prediction of pulmonary hemorrhage in patients with Stenotrophomonas maltophilia respiratory infections and thrombocytopenia
Source: Front Med (Lausanne). 2022 Sep 2;9:940159. doi: 10.3389/fmed.2022.940159 (PMC9486816; doi:10.3389/fmed.2022.940159)
Supplement: Supplementary file 1 [file Table_1.XLSX]

## Sheet: 工作表1
Dependent Variable	(I) LowPLTno	(J) LowPLTno	Mean Difference (I-J)	Std. Error	Sig.	95% Confidence Interval
						Lower Bound	Upper Bound
Lung underlyings	Hema-Onc	Liver	0.063	0.086	0.911	-0.18	0.31
		Sepsis-Rx	-0.155	0.07	0.182	-0.35	0.04
		Others	-0.161	0.086	0.322	-0.4	0.08
	Liver	Hema-Onc	-0.063	0.086	0.911	-0.31	0.18
		Sepsis-Rx	-.218*	0.066	0.014	-0.4	-0.03
		Others	-0.224	0.083	0.065	-0.46	0.01
	Sepsis-Rx	Hema-Onc	0.155	0.07	0.182	-0.04	0.35
		Liver	.218*	0.066	0.014	0.03	0.4
		Others	-0.007	0.066	1	-0.19	0.18
	Others	Hema-Onc	0.161	0.086	0.322	-0.08	0.4
		Liver	0.224	0.083	0.065	-0.01	0.46
		Sepsis-Rx	0.007	0.066	1	-0.18	0.19
MV	Hema-Onc	Liver	-0.105	0.067	0.487	-0.29	0.08
		Sepsis-Rx	-.218*	0.054	0.001	-0.37	-0.07
		Others	-.260*	0.067	0.002	-0.45	-0.07
	Liver	Hema-Onc	0.105	0.067	0.487	-0.08	0.29
		Sepsis-Rx	-0.114	0.051	0.183	-0.26	0.03
		Others	-0.155	0.065	0.125	-0.34	0.03
	Sepsis-Rx	Hema-Onc	.218*	0.054	0.001	0.07	0.37
		Liver	0.114	0.051	0.183	-0.03	0.26
		Others	-0.042	0.051	0.882	-0.19	0.1
	Others	Hema-Onc	.260*	0.067	0.002	0.07	0.45
		Liver	0.155	0.065	0.125	-0.03	0.34
		Sepsis-Rx	0.042	0.051	0.882	-0.1	0.19
APTT prolong	Hema-Onc	Liver	-0.132	0.096	0.594	-0.4	0.14
		Sepsis-Rx	0.003	0.079	1	-0.22	0.22
		Others	-0.012	0.096	1	-0.28	0.26
	Liver	Hema-Onc	0.132	0.096	0.594	-0.14	0.4
		Sepsis-Rx	0.134	0.073	0.333	-0.07	0.34
		Others	0.12	0.091	0.627	-0.14	0.38
	Sepsis-Rx	Hema-Onc	-0.003	0.079	1	-0.22	0.22
		Liver	-0.134	0.073	0.333	-0.34	0.07
		Others	-0.014	0.073	0.998	-0.22	0.19
	Others	Hema-Onc	0.012	0.096	1	-0.26	0.28
		Liver	-0.12	0.091	0.627	-0.38	0.14
		Sepsis-Rx	0.014	0.073	0.998	-0.19	0.22
PT prolong	Hema-Onc	Liver	-0.072	0.095	0.901	-0.34	0.19
		Sepsis-Rx	0.094	0.08	0.708	-0.13	0.32
		Others	0.129	0.098	0.632	-0.15	0.41
	Liver	Hema-Onc	0.072	0.095	0.901	-0.19	0.34
		Sepsis-Rx	0.166	0.071	0.141	-0.03	0.37
		Others	0.201	0.091	0.184	-0.06	0.46
	Sepsis-Rx	Hema-Onc	-0.094	0.08	0.708	-0.32	0.13
		Liver	-0.166	0.071	0.141	-0.37	0.03
		Others	0.035	0.076	0.975	-0.18	0.25
	Others	Hema-Onc	-0.129	0.098	0.632	-0.41	0.15
		Liver	-0.201	0.091	0.184	-0.46	0.06
		Sepsis-Rx	-0.035	0.076	0.975	-0.25	0.18
ExtreLowPlt	Hema-Onc	Liver	.282*	0.074	0.002	0.08	0.49
		Sepsis-Rx	.490*	0.06	0	0.32	0.66
		Others	.545*	0.073	0	0.34	0.75
	Liver	Hema-Onc	-.282*	0.074	0.002	-0.49	-0.08
		Sepsis-Rx	.208*	0.057	0.004	0.05	0.37
		Others	.263*	0.071	0.004	0.06	0.46
	Sepsis-Rx	Hema-Onc	-.490*	0.06	0	-0.66	-0.32
		Liver	-.208*	0.057	0.004	-0.37	-0.05
		Others	0.055	0.056	0.807	-0.1	0.21
	Others	Hema-Onc	-.545*	0.073	0	-0.75	-0.34
		Liver	-.263*	0.071	0.004	-0.46	-0.06
		Sepsis-Rx	-0.055	0.056	0.807	-0.21	0.1
PLT of test day	Hema-Onc	Liver	-19.791	9.022	0.188	-45.11	5.53
		Sepsis-Rx	-49.107*	7.3	0	-69.6	-28.62
		Others	-56.766*	8.99	0	-82	-31.54
	Liver	Hema-Onc	19.791	9.022	0.188	-5.53	45.11
		Sepsis-Rx	-29.316*	6.925	0.001	-48.75	-9.88
		Others	-36.976*	8.688	0	-61.36	-12.59
	Sepsis-Rx	Hema-Onc	49.107*	7.3	0	28.62	69.6
		Liver	29.316*	6.925	0.001	9.88	48.75
		Others	-7.659	6.883	0.744	-26.98	11.66
	Others	Hema-Onc	56.766*	8.99	0	31.54	82
		Liver	36.976*	8.688	0	12.59	61.36
		Sepsis-Rx	7.659	6.883	0.744	-11.66	26.98
d_14	Hema-Onc	Liver	21.03963*	6.93381	0.028	1.5798	40.4995
		Sepsis-Rx	44.28967*	5.61061	0	28.5434	60.0359
		Others	48.86947*	6.90923	0	29.4786	68.2603
	Liver	Hema-Onc	-21.03963*	6.93381	0.028	-40.4995	-1.5798
		Sepsis-Rx	23.25004*	5.32224	0	8.3131	38.187
		Others	27.82984*	6.67718	0.001	9.0902	46.5694
	Sepsis-Rx	Hema-Onc	-44.28967*	5.61061	0	-60.0359	-28.5434
		Liver	-23.25004*	5.32224	0	-38.187	-8.3131
		Others	4.5798	5.29017	0.861	-10.2671	19.4267
	Others	Hema-Onc	-48.86947*	6.90923	0	-68.2603	-29.4786
		Liver	-27.82984*	6.67718	0.001	-46.5694	-9.0902
		Sepsis-Rx	-4.5798	5.29017	0.861	-19.4267	10.2671
Hemoptysis	Hema-Onc	Liver	0.094	0.082	0.728	-0.14	0.32
		Sepsis-Rx	0.129	0.066	0.288	-0.06	0.32
		Others	0.083	0.082	0.794	-0.15	0.31
	Liver	Hema-Onc	-0.094	0.082	0.728	-0.32	0.14
		Sepsis-Rx	0.035	0.063	0.957	-0.14	0.21
		Others	-0.011	0.079	0.999	-0.23	0.21
	Sepsis-Rx	Hema-Onc	-0.129	0.066	0.288	-0.32	0.06
		Liver	-0.035	0.063	0.957	-0.21	0.14
		Others	-0.046	0.063	0.91	-0.22	0.13
	Others	Hema-Onc	-0.083	0.082	0.794	-0.31	0.15
		Liver	0.011	0.079	0.999	-0.21	0.23
		Sepsis-Rx	0.046	0.063	0.91	-0.13	0.22
Death	Hema-Onc	Liver	0.196	0.085	0.149	-0.04	0.43
		Sepsis-Rx	0	0.069	1	-0.19	0.19
		Others	0.189	0.084	0.173	-0.05	0.43
	Liver	Hema-Onc	-0.196	0.085	0.149	-0.43	0.04
		Sepsis-Rx	-.196*	0.065	0.03	-0.38	-0.01
		Others	-0.007	0.082	1	-0.24	0.22
	Sepsis-Rx	Hema-Onc	0	0.069	1	-0.19	0.19
		Liver	.196*	0.065	0.03	0.01	0.38
		Others	.189*	0.065	0.038	0.01	0.37
	Others	Hema-Onc	-0.189	0.084	0.173	-0.43	0.05
		Liver	0.007	0.082	1	-0.22	0.24
		Sepsis-Rx	-.189*	0.065	0.038	-0.37	-0.01
